# Supplementary figures and images for: SnS hollow nanofibers as anode materials for sodium-ion batteries with high capacity and ultra-long cycling stability
Source: Royal Society of Chemistry journal article supplement (doi:10.1039/c8cc07332e), 2018-12-06

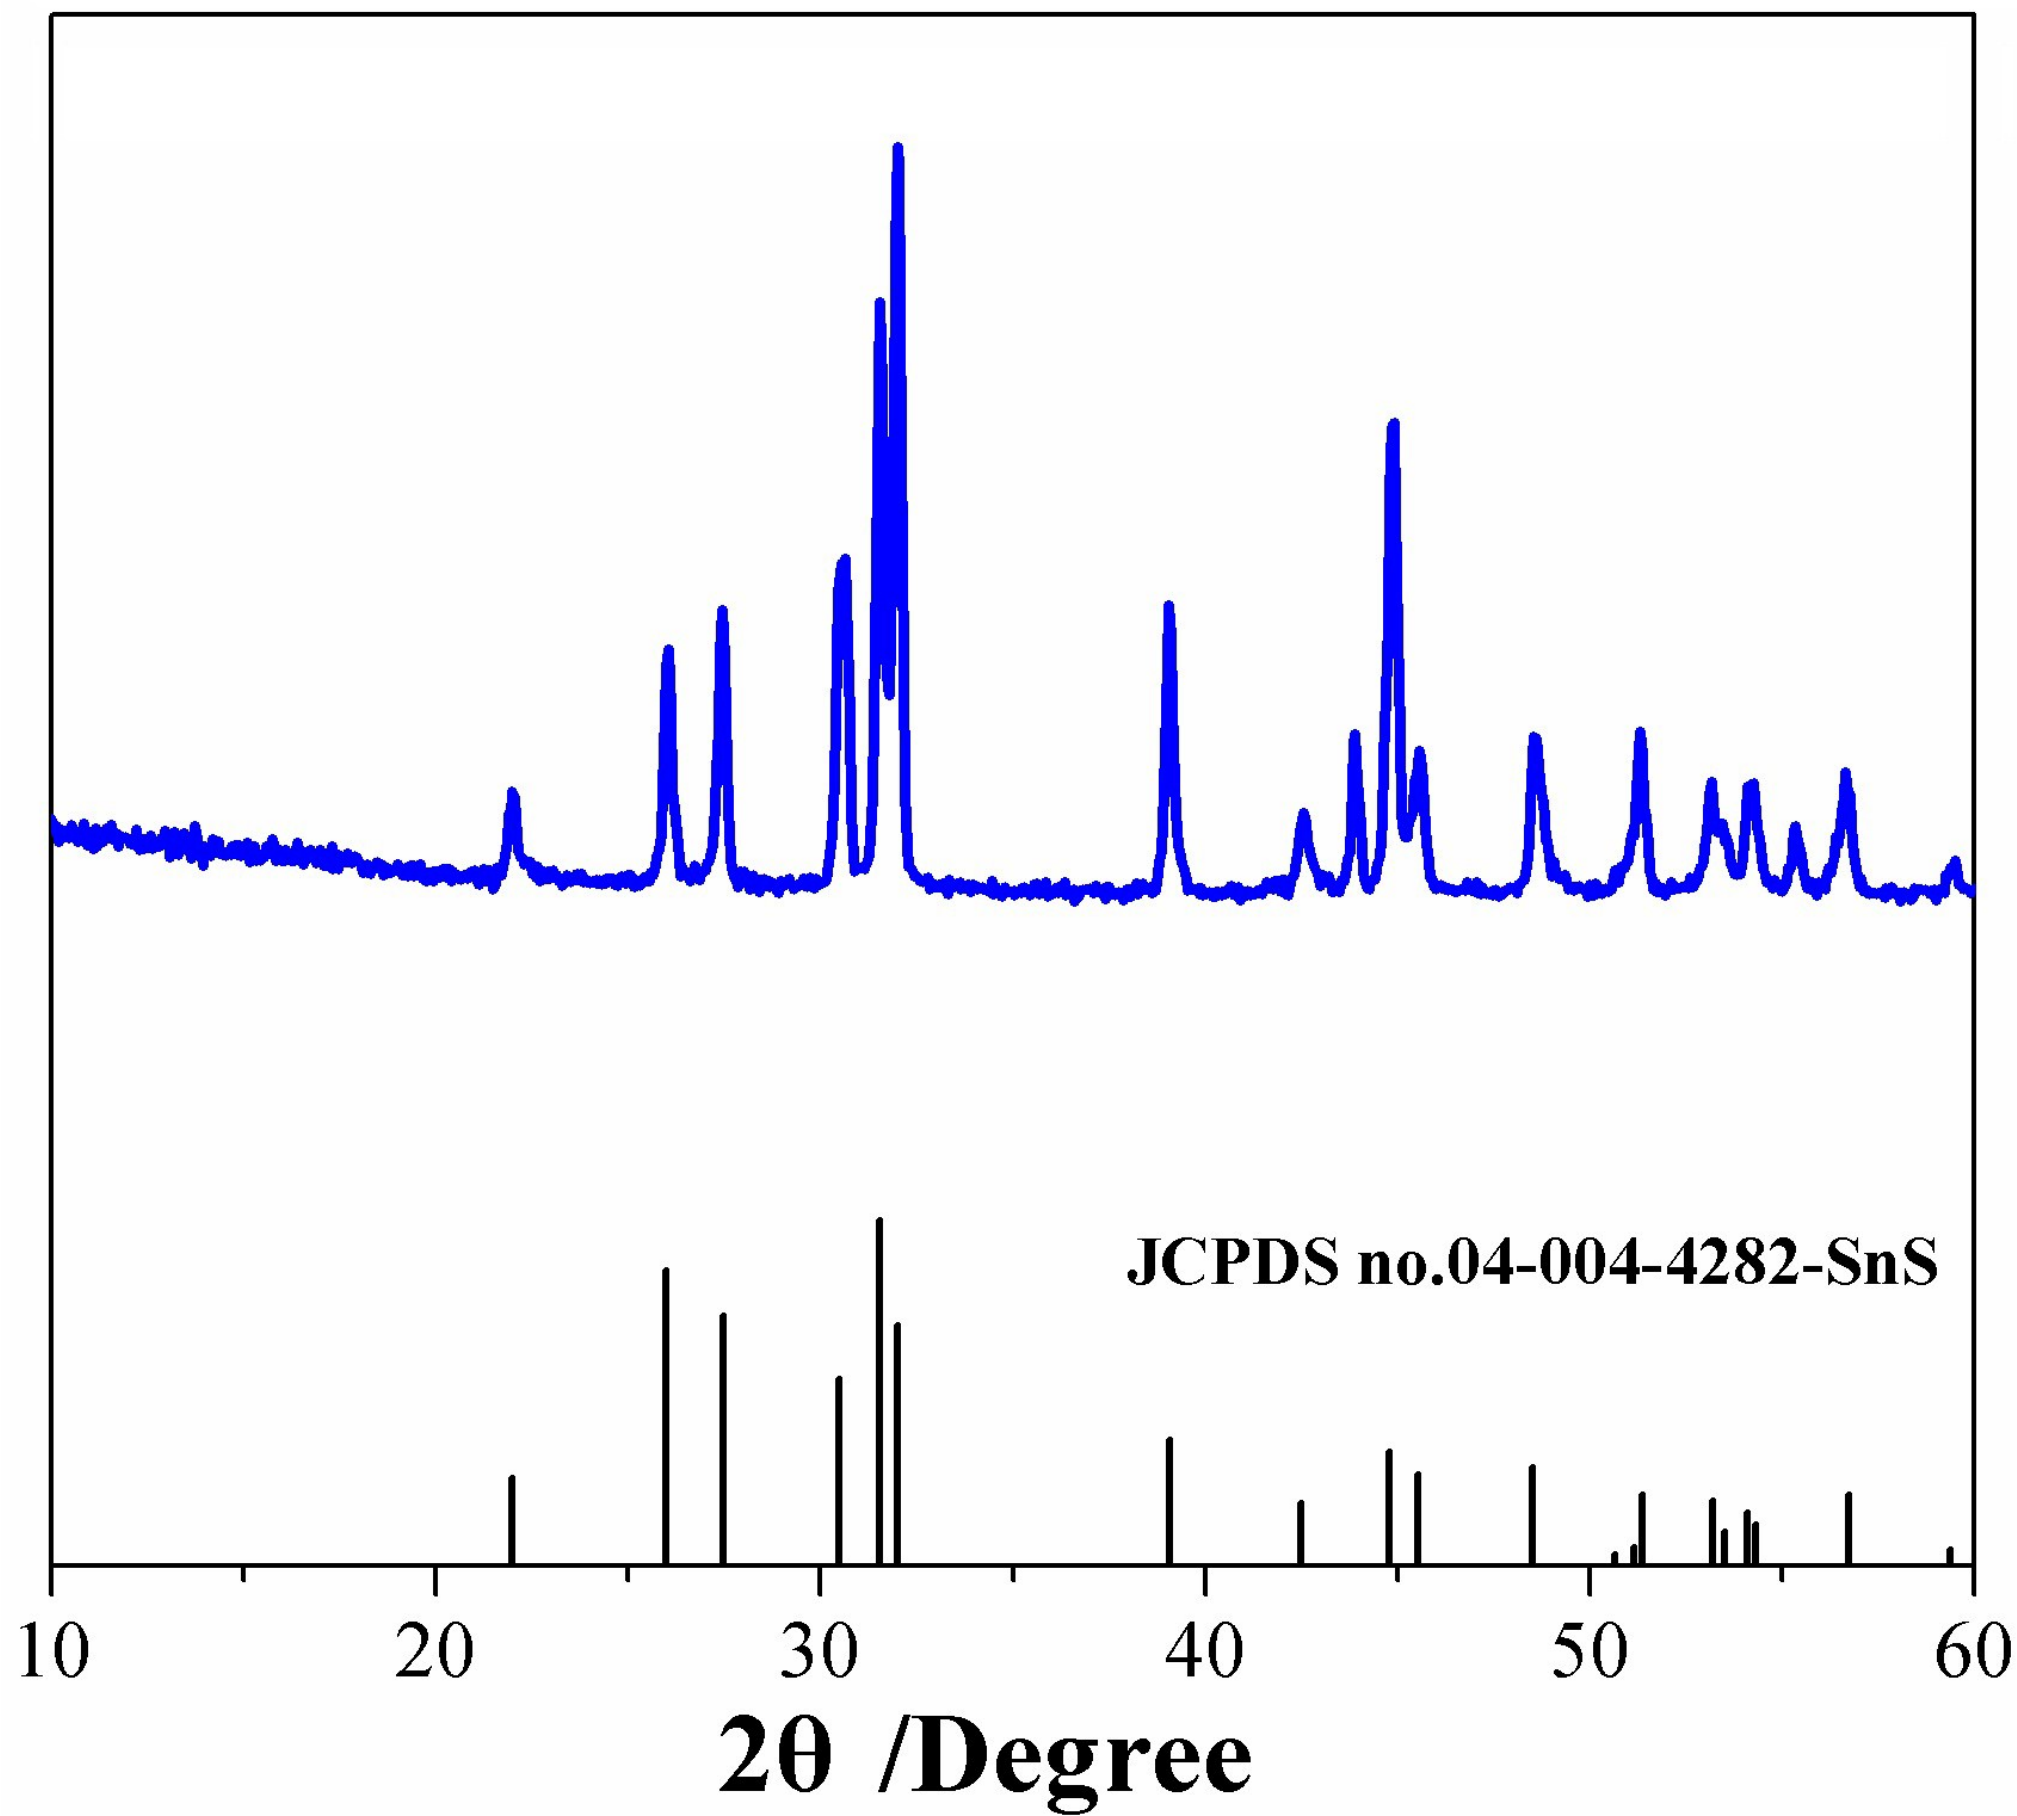

Supplement: c8cc07332e1.pdf [file c8cc07332e1.pdf]

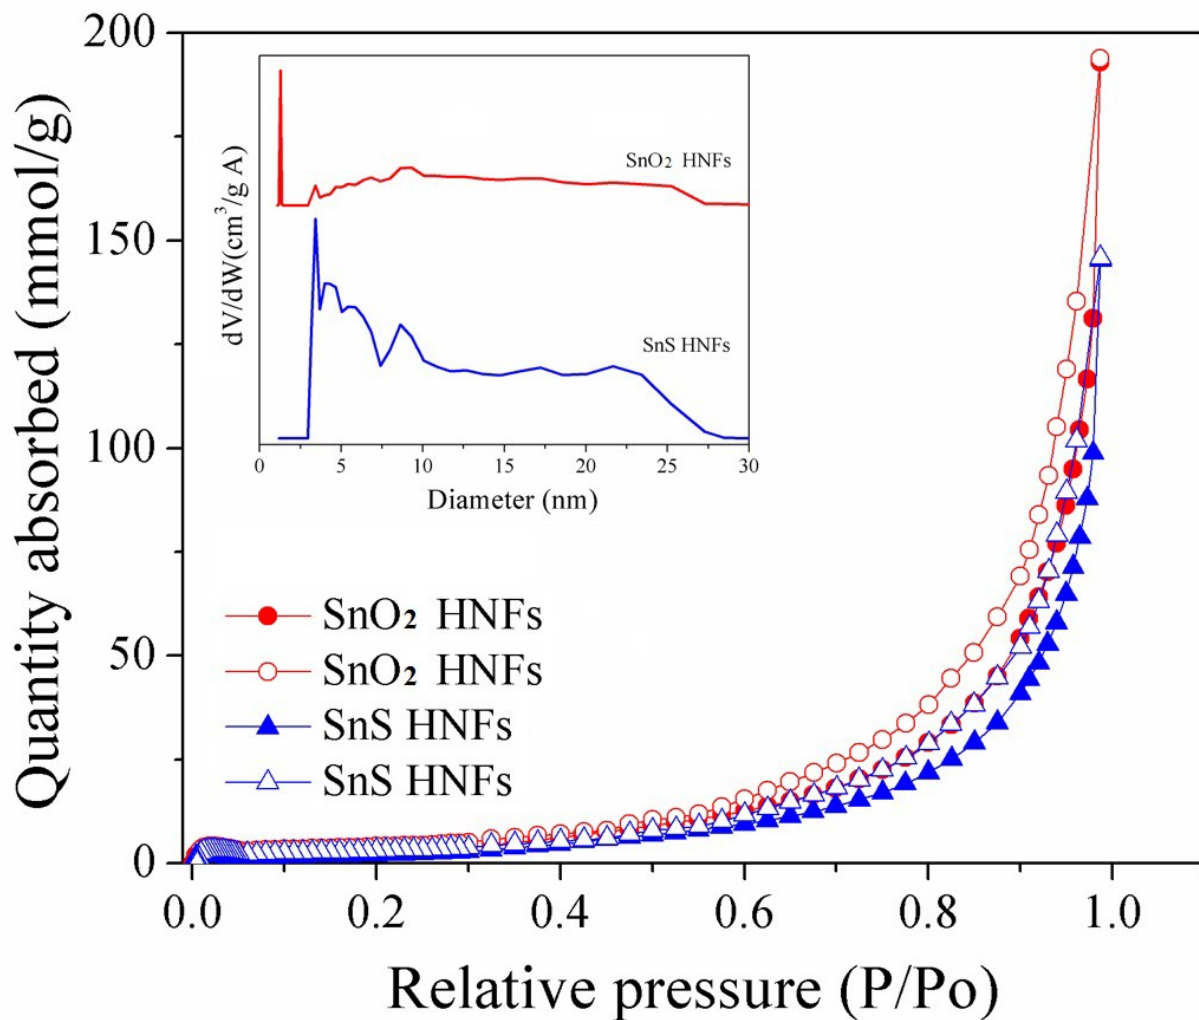

Supplement: c8cc07332e2.pdf [file c8cc07332e2.pdf]

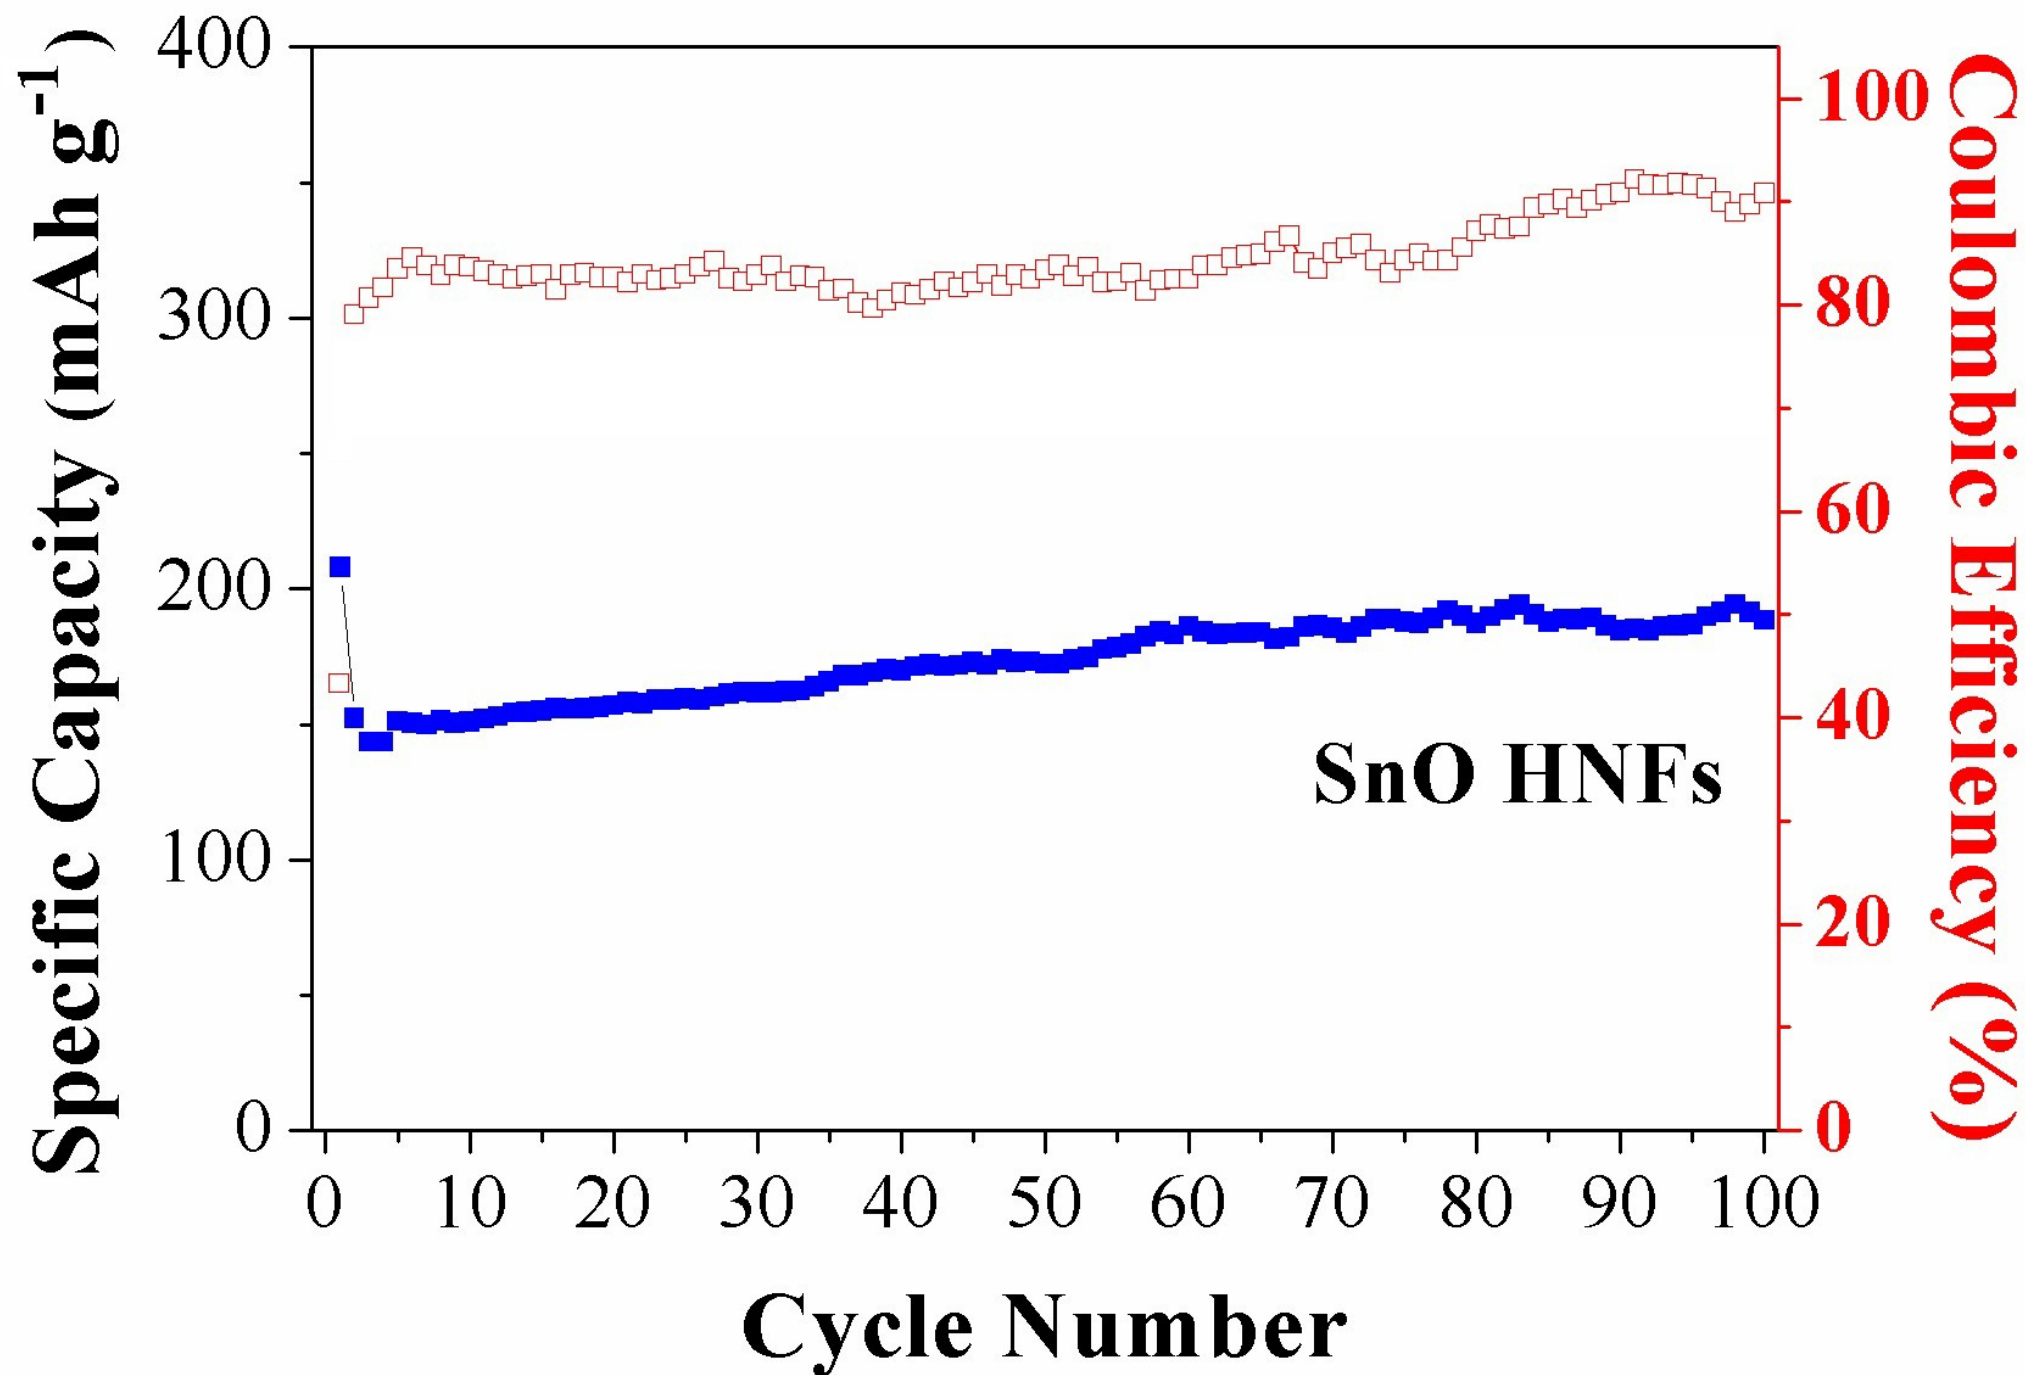

Supplement: c8cc07332e3.pdf [file c8cc07332e3.pdf]

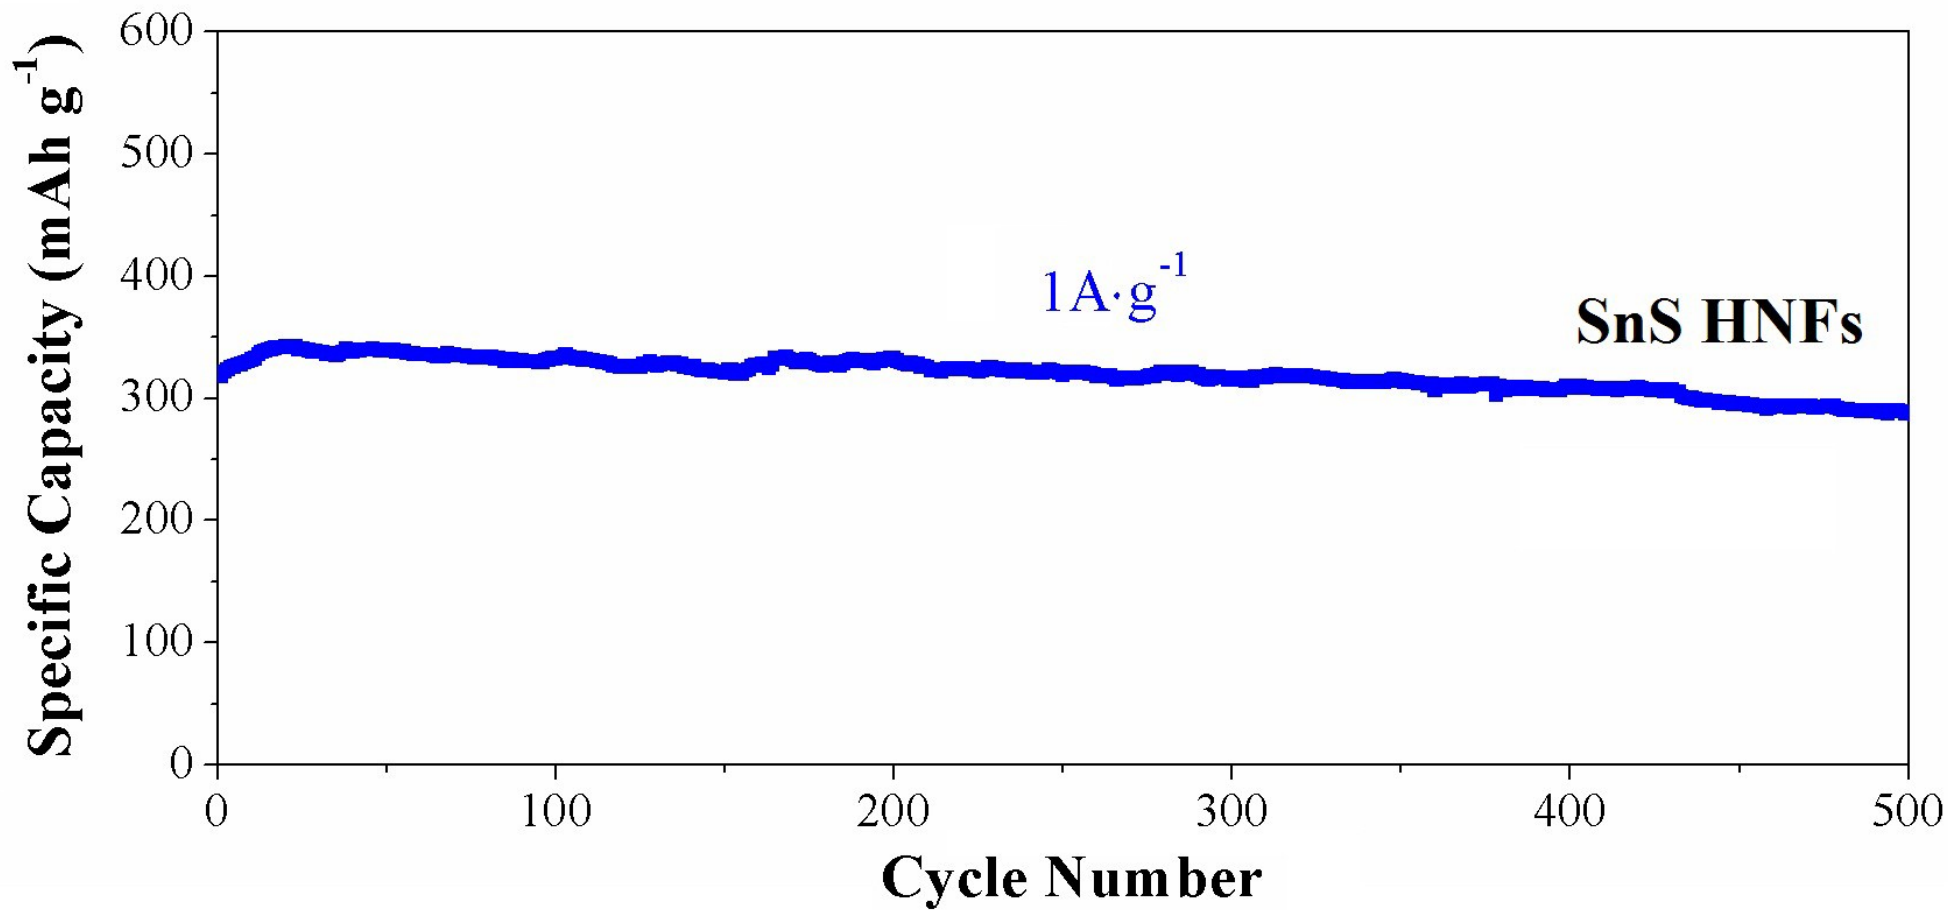

Supplement: c8cc07332e4.pdf [file c8cc07332e4.pdf]

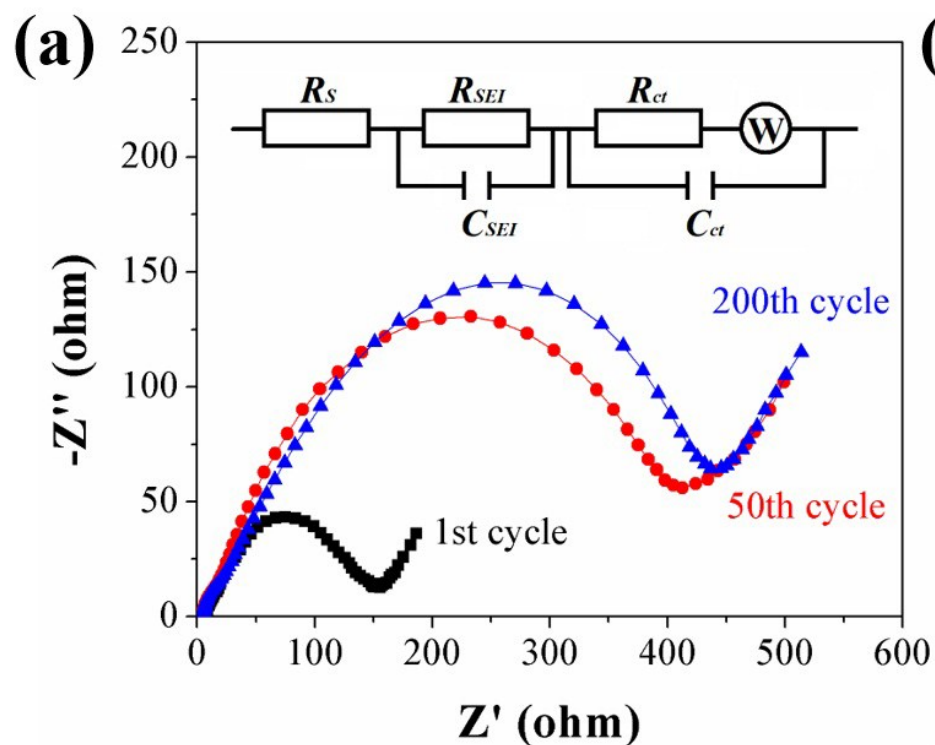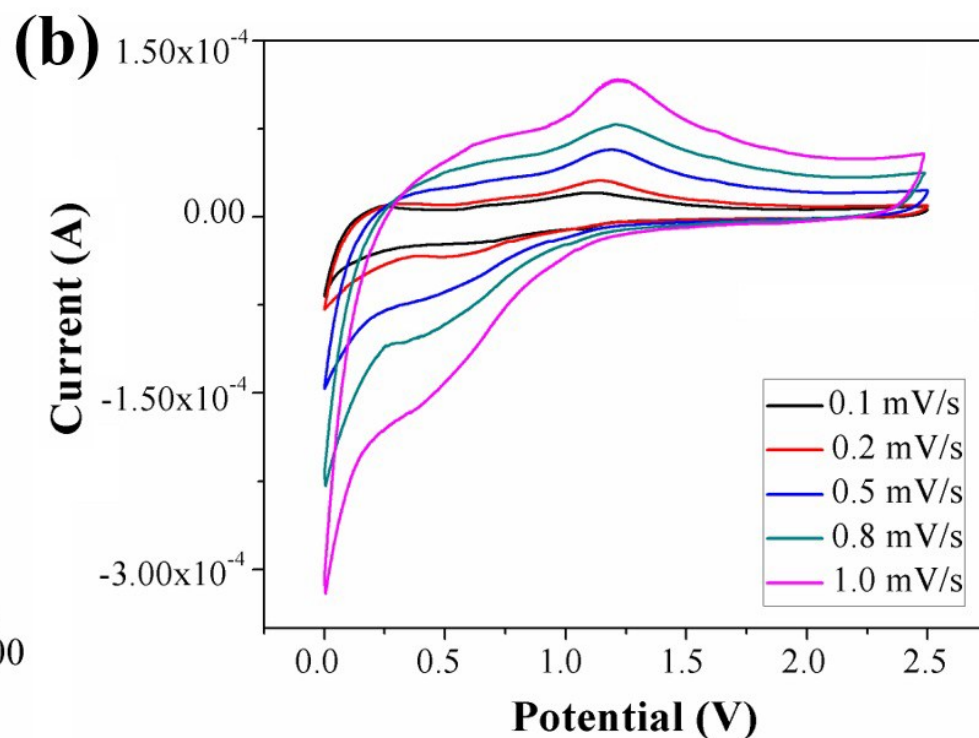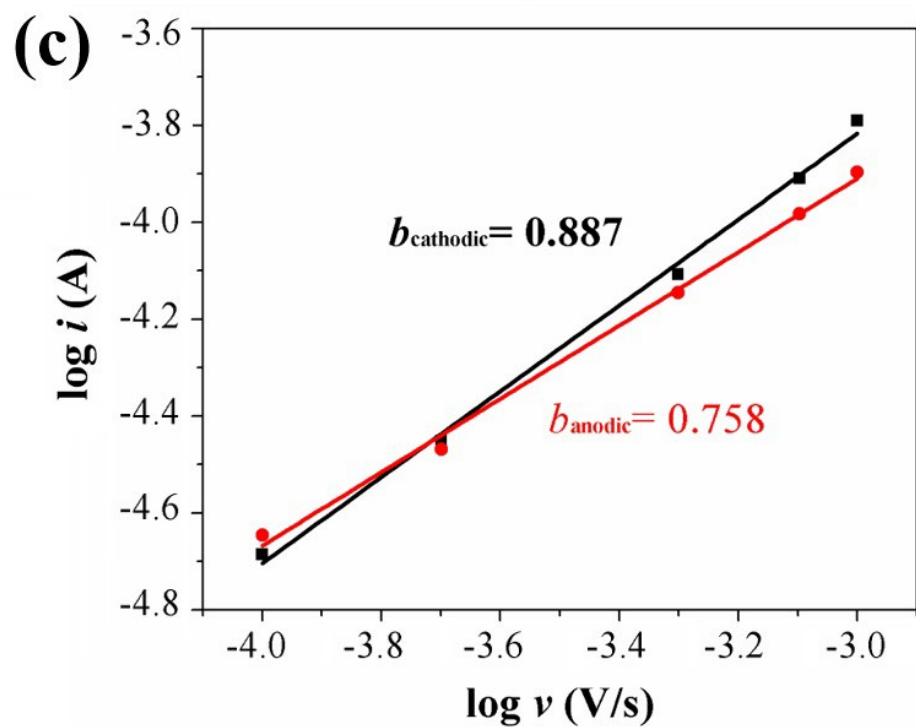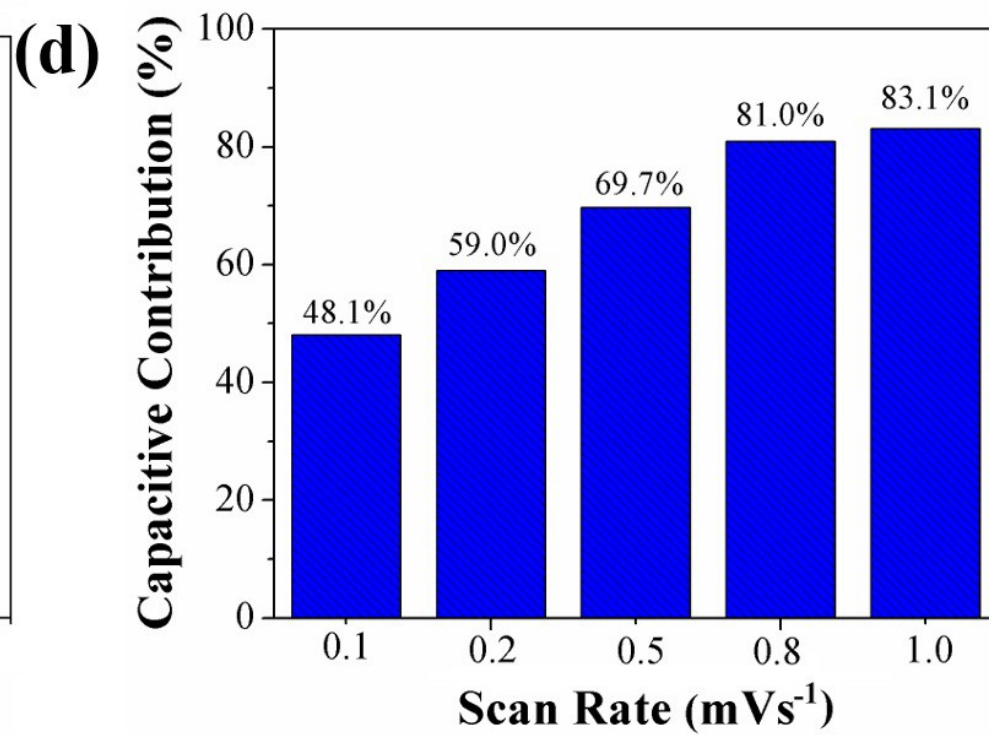

Supplement: c8cc07332e5.pdf [file c8cc07332e5.pdf]

(a)

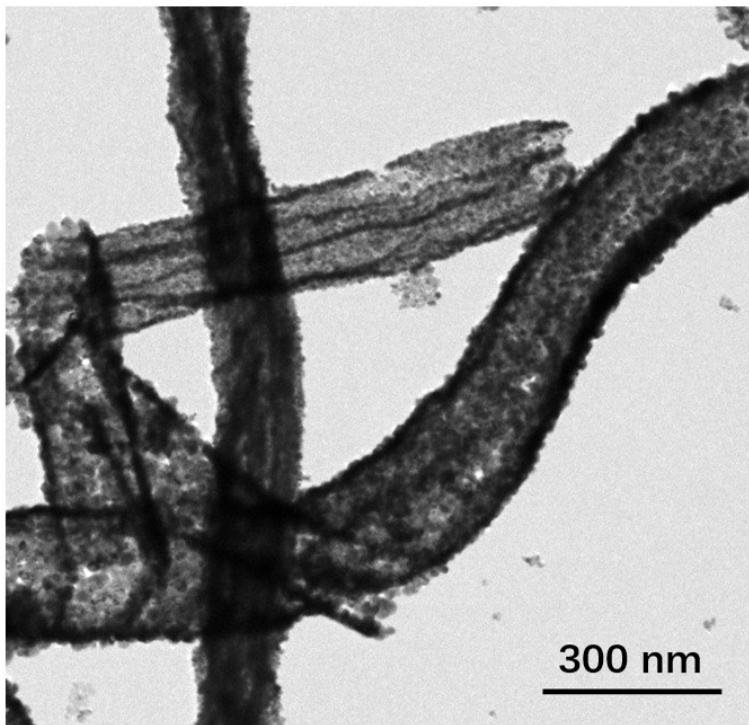

(b)

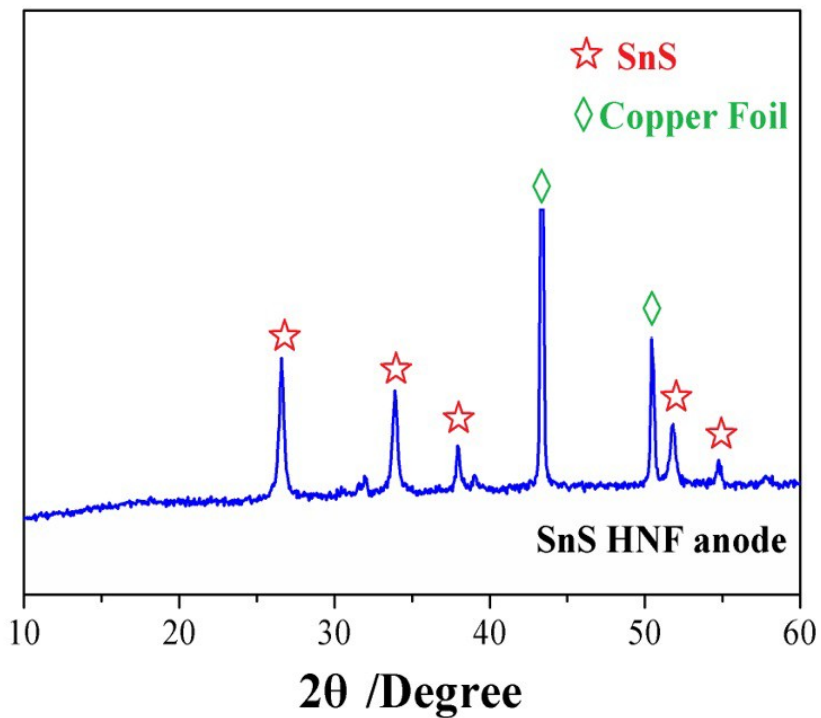

Supplement: c8cc07332e6.pdf [file c8cc07332e6.pdf]
